# Supplementary material
Source: PubMed Central journal article supplement (PMC5902797)
Supplement: NIHMS955243-supplement-supplement_1.pdf [file NIHMS955243-supplement-supplement_1.pdf]

# Supplementary Materials

## 1. Supplementary figures

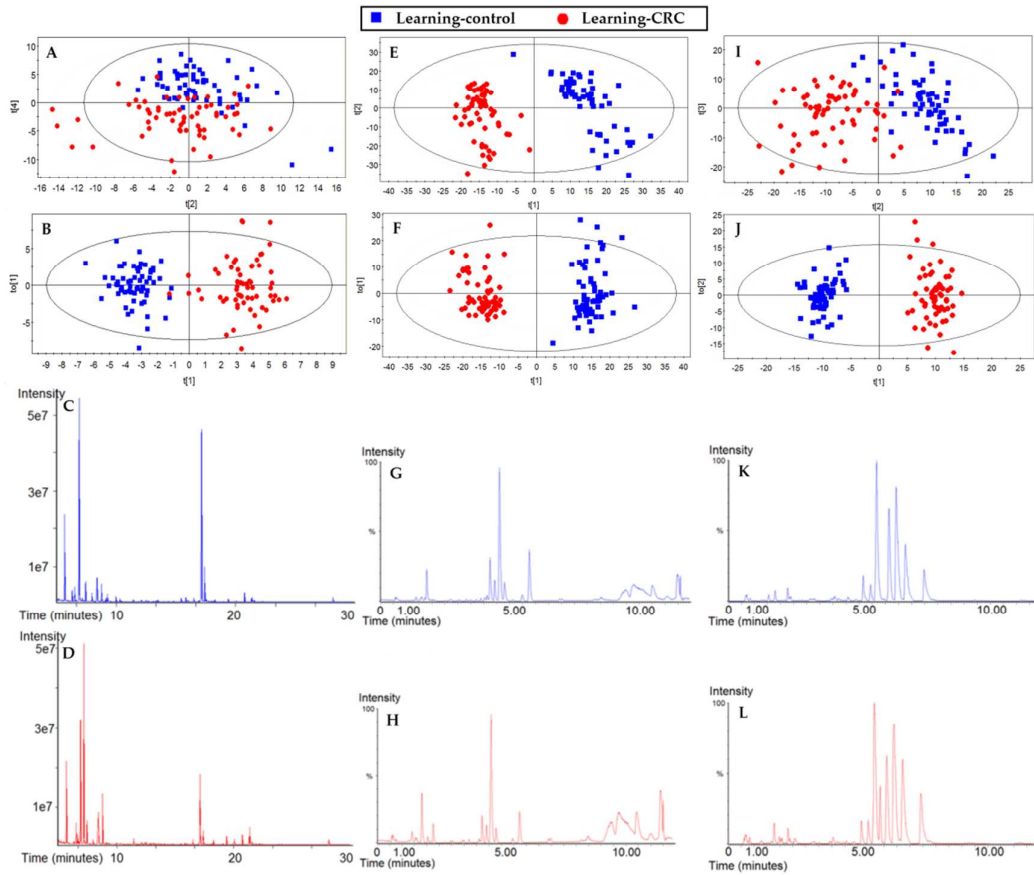

### Supplementary Fig. 1

The results from GC-TOFMS (A-D), UPLC-QTOFMS ES+ (E-H), and UPLC-QTOFMS ES- (I-L) analysis. PCA and OPLS-DA model for 62 CRC patients (red dots) and 62 healthy controls (blue squares) based on total spectral data of GC-TOFMS (A and B); UPLC-QTOFMS ES+ (E and F); and UPLC-QTOFMS ES- (I and J). At the bottom of OPLS-DA model, three representative chromatograms of CRC (red) and healthy control sample (blue) derived from GC-TOFMS, UPLC-QTOFMS ES+ and ES-, respectively (C-D, G-H and K-I).

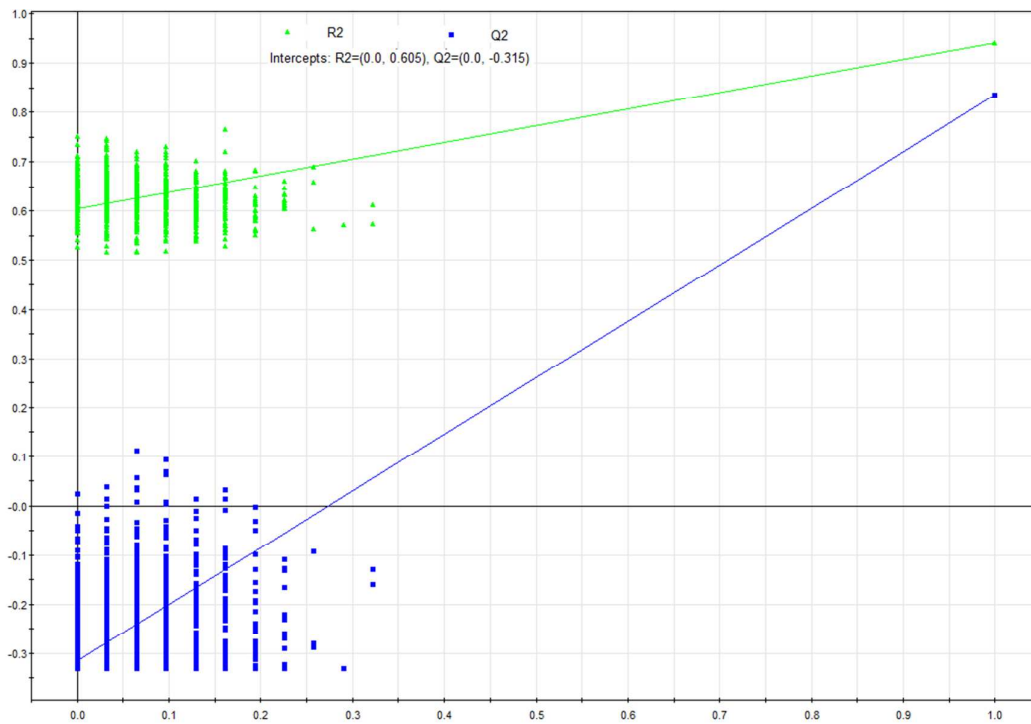

**Supplementary Fig. 2**

A 999-time permutation test validated the OPLS-DA model with 249 annotated metabolites between healthy controls and CRC patients in the learning data set. Y-axis intercepts: R2= (0.0, 0.605), Q2= (0.0, -0.309).

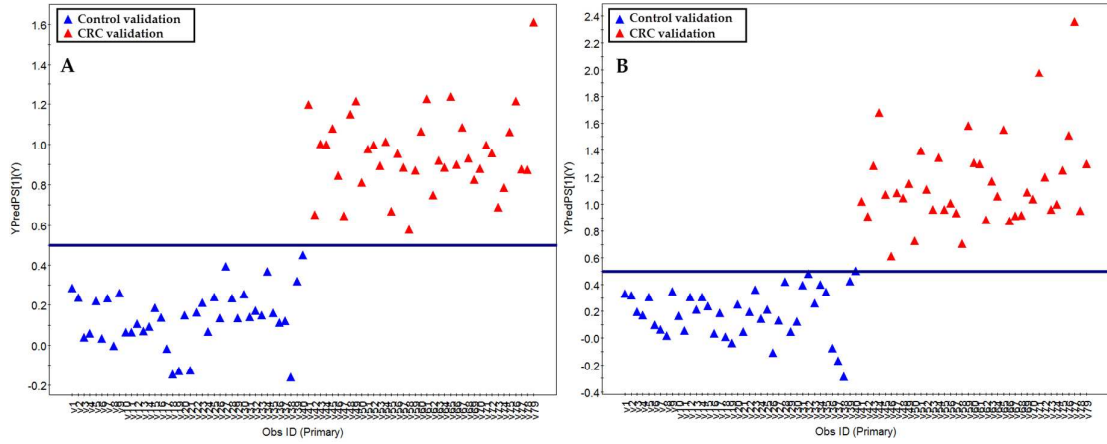

### Supplementary Fig. 3

Y-predicted scatter plots of samples in validation groups. A, the model was built with males only in the training dataset. B, the model was built with females only in the training dataset. A number of 40 healthy controls (blue triangle) and 39 CRC patients (red triangle) as a validation group were used to test the prediction ability for the OPLS-DA model using a cut-off of 0.5.

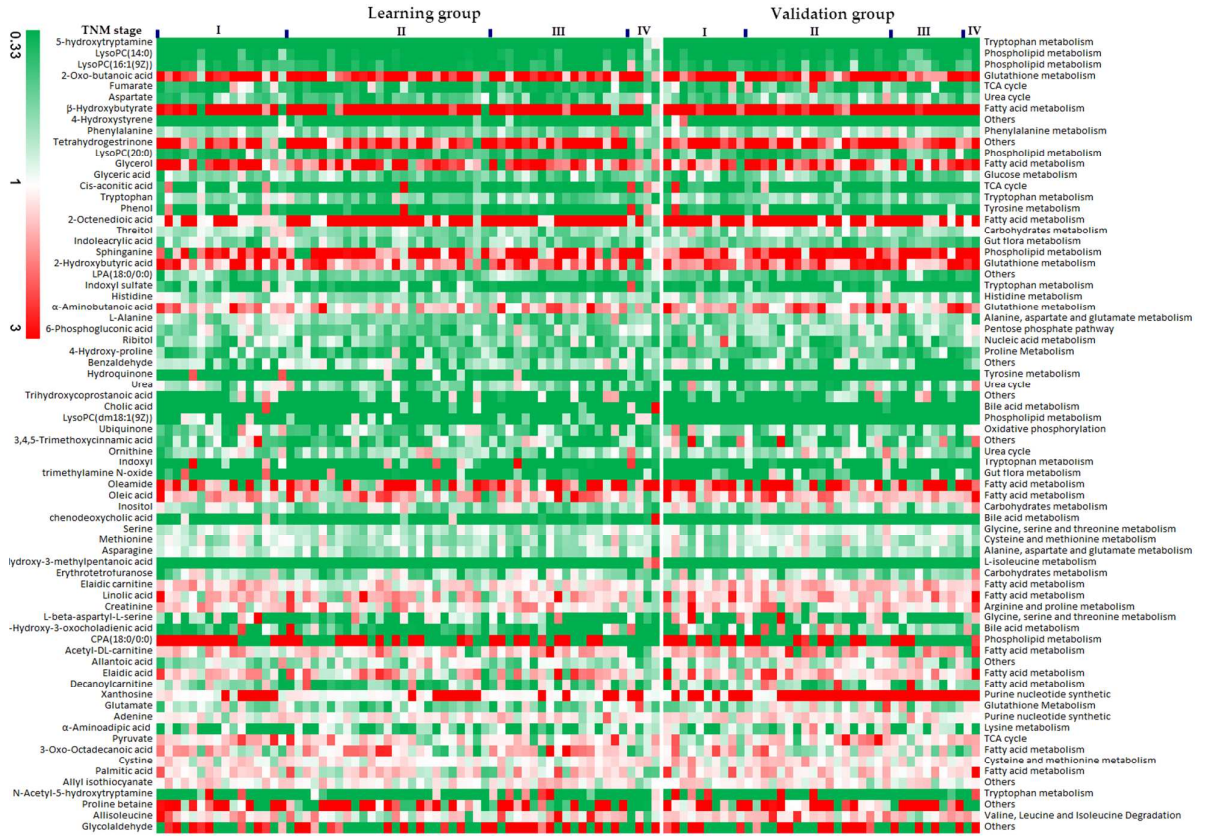

**Supplementary Fig. 4**

Fold changes (FC) heat-map of differentially expressed metabolites between CRC patients (both in training set and testing set). Each row represents one metabolite and each column is one patient. Fold changes (FC) are the intensity ratios of every patient to the mean value of learning healthy controls.

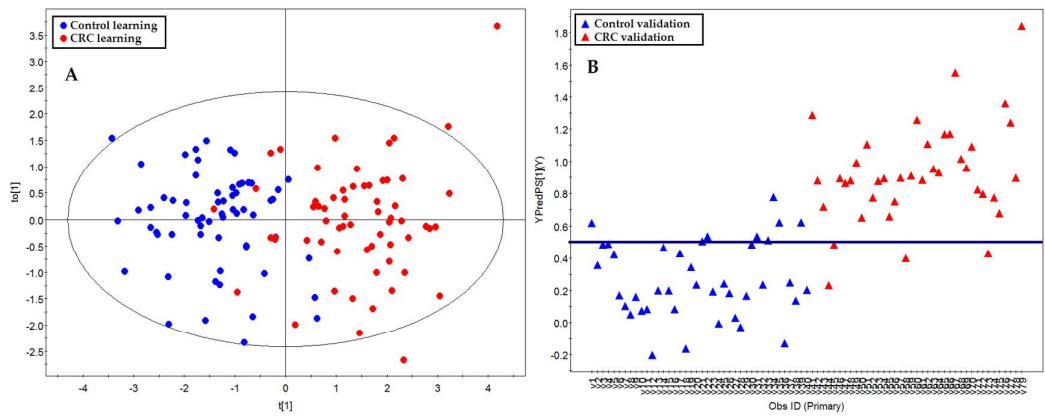

**Supplementary Fig. 5**

Diagnostic potential of 10 shared differential metabolites identified in two CRC metabonomics studies with two independent cohorts. A, OPLS-DA scores plot of in the training dataset. The OPLS-DA model was constructed using data from 62 CRC patients (red dots) and 62 healthy controls (blue dots). B, Y-predicted scatter plot of samples in validation groups. A number of 40 healthy controls (blue triangle) and 39 CRC patients (red triangle) were used to test the prediction ability for the erected OPLS-DA model. The prediction ability of the OPLS-DA model was made with a cut-off of 0.5.

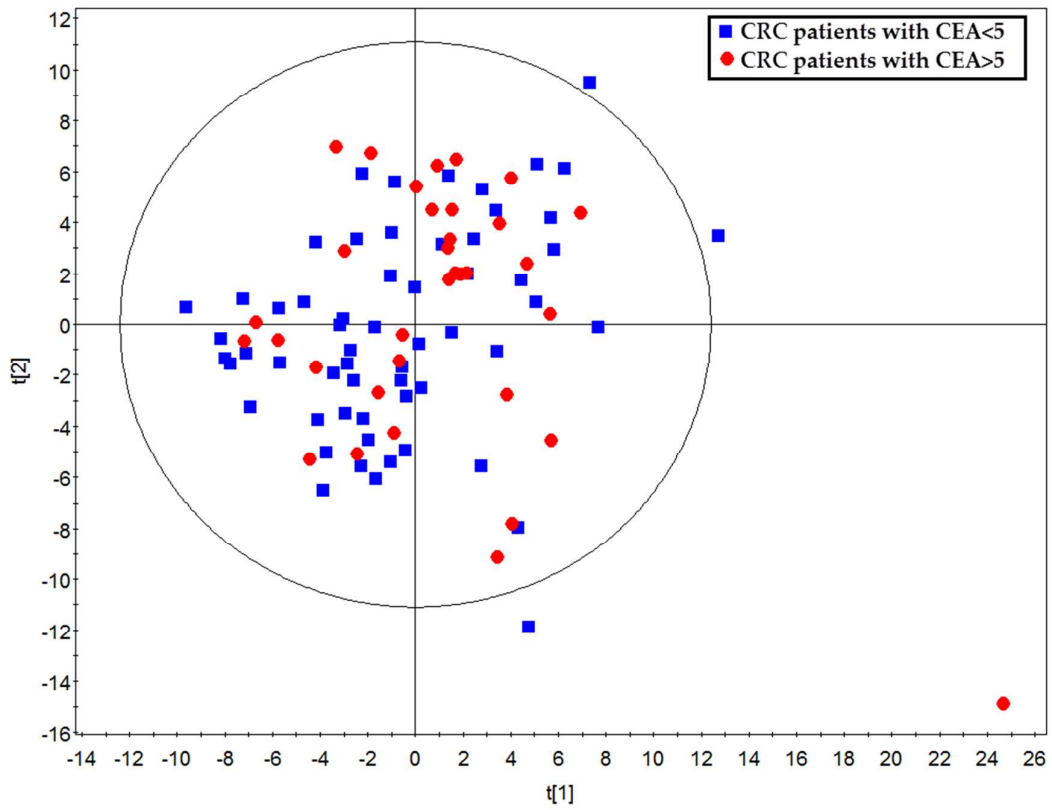

**Supplementary Fig. 6**

PCA scores plot for all the CRC samples with high (CEA>5) or low CEA (CEA<5) values, suggesting that there is no statistical correlation between the metabonomics data and the CEA values in CRC subjects.

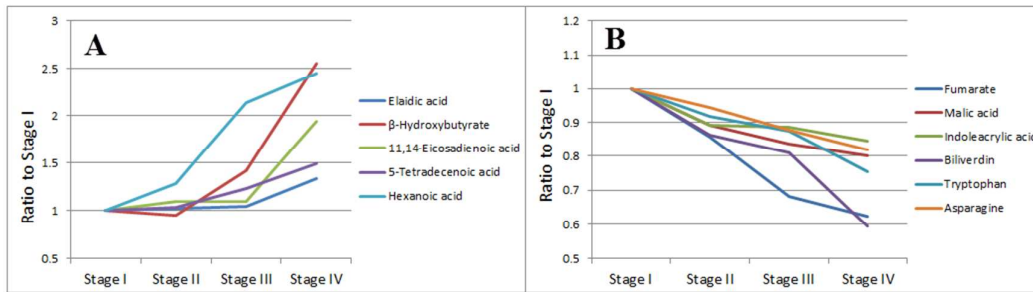

**Supplementary Fig. 7**

Metabolites with expression levels changed in a consistent trend (A, increase, B, decrease) from stage I to IV of CRC (values normalized to stage I). The data with the CRC patients in the learning group and validation group were combined, to increase the sample size, especially for stage IV patients,

## 2. Supplementary Table

Supplementary Table 1. Identified serum metabolites derived from GC-TOFMS and UPLC-QTOFMS

| No. | Compounds                                   | Platform <sup>b</sup> | Library <sup>c</sup> | Retention<br>time (min) | M <sup>d</sup> | MR <sup>e</sup> | Missing<br>number <sup>f</sup> |
|-----|---------------------------------------------|-----------------------|----------------------|-------------------------|----------------|-----------------|--------------------------------|
| 1   | 11,14-Eicosadienoic acid <sup>a</sup>       | G                     | std                  | 22.5                    | 67             |                 |                                |
| 2   | 12a-Hydroxy-3-oxocholadienic acid           | P                     | HMDB                 | 3.18                    | 386.2453       | 386.2457        | 58                             |
| 3   | 12-Ketodeoxycholic acid                     | N                     | HMDB                 | 3.18                    | 390.2756       | 390.277         | 111                            |
| 4   | 12-keto-tetrahydro-Leukotriene B4           | P                     | HMDB                 | 6.69                    | 338.2425       | 338.2457        | 0                              |
| 5   | 13-cis-Retinoic acid                        | P                     | HMDB                 | 5.14                    | 300.207        | 300.2089        | 133                            |
| 6   | 1b-Hydroxycholic acid                       | N                     | HMDB                 | 9.40                    | 424.2797       | 424.2825        | 0                              |
| 7   | 1-Methylhistamine                           | P                     | HMDB                 | 9.41                    | 125.0942       | 125.0953        | 0                              |
| 8   | 1-Monopalmitin                              | G                     | std                  | 23.35                   | 57             |                 |                                |
| 9   | 2,3-Dihydroxybutanoic acid <sup>a</sup>     | G                     | NIST                 | 9.74                    | 117            |                 |                                |
| 10  | 24-Hydroxycalcitriol                        | N                     | HMDB                 | 3.82                    | 432.3222       | 432.324         | 0                              |
| 11  | 2-Arachidonylglycerol                       | N                     | HMDB                 | 3.38                    | 378.2754       | 378.277         | 97                             |
| 12  | 2-Ethyl-3-hydroxypropionic acid             | G                     | NIST                 | 8.18                    | 73             |                 |                                |
| 13  | 2-Hydroxy-3-methylbutyric acid <sup>a</sup> | P                     | std                  | 1.82                    | 118.0643       |                 | 0                              |
| 14  | 2-Hydroxy-3-methylpentanoic acid            | P                     | HMDB                 | 2.65                    | 132.0772       | 132.0786        | 0                              |
| 15  | 2-Hydroxybutyric acid <sup>a</sup>          | G                     | std                  | 6.66                    | 131            |                 |                                |
| 16  | 2-Methylacetoacetic acid                    | P                     | HMDB                 | 0.82                    | 116.0472       | 116.0473        | 0                              |
| 17  | 2-Methylbutyroyl carnitine                  | P                     | HMDB                 | 1.85                    | 245.161        | 245.1627        | 0                              |
| 18  | 2-Oxo-3-methylbutanoic acid                 | G                     | NIST                 | 6.41                    | 89             |                 |                                |
| 19  | 2-Oxo-4-methylthiobutanoic acid             | P                     | HMDB                 | 3.53                    | 148.0152       | 148.0194        | 0                              |
| 20  | 2-Oxo-4-methylvaleric acid                  | G                     | std                  | 7.74                    | 89             |                 |                                |
| 21  | 2-Oxo-butanoic acid                         | G                     | NIST                 | 6.79                    | 89             |                 |                                |
| 22  | 2-Oxo-pentanedioic acid                     | G                     | std                  | 12.81                   | 73             |                 |                                |
| 23  | 2-Oxopentanoic acid                         | G                     | NIST                 | 7.94                    | 89             |                 |                                |
| 24  | 2-Phenylethanol glucuronide                 | P                     | HMDB                 | 3.01                    | 298.1029       | 298.1053        | 0                              |
| 25  | 2-Piperidinecarboxylic acid                 | G                     | std                  | 10.13                   | 156            |                 |                                |
| 26  | 3,4,5-Trimethoxycinnamic acid               | P                     | HMDB                 | 2.25                    | 238.0834       | 238.0841        | 0                              |
| 27  | 3,4-Dihydroxybutanoic acid                  | G                     | NIST                 | 10.95                   | 73             |                 |                                |
| 28  | 3-Furoic acid                               | P                     | HMDB                 | 1.81                    | 112.0111       | 112.016         | 0                              |
| 29  | 3-Hydroxybutyric acid                       | G                     | std                  | 7.19                    | 117            |                 |                                |
| 30  | 3-Hydroxy-hexadecanoic acid                 | N                     | HMDB                 | 3.97                    | 272.2345       | 272.2351        | 1                              |
| 31  | 3-Hydroxy-octadecanoic acid                 | N                     | HMDB                 | 4.52                    | 300.2657       | 300.2664        | 7                              |
| 32  | 3-Oxo-Octadecanoic acid                     | P                     | HMDB                 | 4.24                    | 298.25         | 298.2508        | 0                              |
| 33  | 4,8-Dimethylnonanoyl carnitine              | P                     | HMDB                 | 3.58                    | 329.2556       | 329.2566        | 0                              |
| 34  | 4-Aminobutanoic acid                        | G                     | std                  | 14                      | 326            |                 |                                |
| 35  | 4-Aminophenol                               | N                     | HMDB                 | 0.76                    | 109.0532       | 109.0528        | 133                            |
| 36  | 4-Hydroxy-3-methoxymandelic acid            | N                     | std                  | 0.73                    | 198.0379       |                 | 14                             |



|    |                                           |   |      |       |          |          |    |
|----|-------------------------------------------|---|------|-------|----------|----------|----|
| 37 | 4-Hydroxyisovaleric acid                  | P | HMDB | 0.76  | 118.0625 | 118.063  | 11 |
| 38 | 4-Hydroxy-proline                         | G | std  | 12.16 | 140      |          |    |
| 39 | 4-Hydroxystyrene                          | N | HMDB | 1.81  | 120.0573 | 120.0575 | 85 |
| 40 | 4-Oxo-Retinoic acid                       | N | HMDB | 6.11  | 314.1896 | 314.1882 | 0  |
| 41 | 5,8-Tetradecadienoic acid                 | N | HMDB | 4.28  | 224.1765 | 224.1776 | 3  |
| 42 | 5-Aminoimidazole                          | P | HMDB | 0.69  | 83.0439  | 83.0483  | 0  |
| 43 | 5-Dodecenoic acid                         | N | HMDB | 4.06  | 198.161  | 198.162  | 55 |
| 44 | 5Hydroxytryptamine                        | P | std  | 1.63  | 176.1035 |          | 85 |
| 45 | 5-Oxoproline <sup>a</sup>                 | G | std  | 12.14 | 156      |          |    |
| 46 | 5-Tetradecenoic acid                      | P | HMDB | 4.66  | 226.1922 | 226.1933 | 0  |
| 47 | 6-Phosphogluconic acid <sup>a</sup>       | G | std  | 21.28 | 73       |          |    |
| 48 | 7,10-Hexadecadienoic acid                 | P | HMDB | 4.88  | 252.2081 | 252.2089 | 2  |
| 49 | 8,11,14-eicosatrienoic acid               | G | NIST | 22.37 | 67       |          |    |
| 50 | 9-HODE                                    | P | HMDB | 4.46  | 296.2343 | 296.2351 | 8  |
| 51 | Acetyl carnitine                          | P | std  | 0.77  | 203.1146 |          | 10 |
| 52 | Acetyl-N-formyl-5-methoxykynurena<br>mine | N | HMDB | 1.90  | 264.1116 | 264.111  | 0  |
| 53 | Adenine                                   | P | std  | 1.15  | 135.0666 |          | 0  |
| 54 | Adenylylselenate                          | N | HMDB | 0.77  | 474.963  | 474.9644 | 13 |
| 55 | Alanine <sup>a</sup>                      | G | std  | 6.33  | 116      |          |    |
| 56 | Allantoic acid                            | N | HMDB | 0.59  | 176.054  | 176.0546 | 0  |
| 57 | Allisoleucine                             | G | NIST | 9.03  | 158      |          |    |
| 58 | Allyl isothiocyanate                      | P | HMDB | 0.77  | 99.0139  | 99.0143  | 0  |
| 59 | Aminomalonic acid                         | G | std  | 11.46 | 73       |          |    |
| 60 | Androsterone sulfate                      | P | HMDB | 2.44  | 370.1804 | 370.1814 | 3  |
| 61 | Arabinofuranose                           | G | NIST | 15.5  | 217      |          |    |
| 62 | Arabinose                                 | G | std  | 14.05 | 103      |          |    |
| 63 | Arabitol                                  | G | std  | 14.62 | 73       |          |    |
| 64 | Arachidonic acid <sup>a</sup>             | G | std  | 22.26 | 91       |          |    |
| 65 | Arginine                                  | P | std  | 0.64  | 174.1105 |          | 1  |
| 66 | Asparagine                                | G | std  | 14.02 | 116      |          |    |
| 67 | Aspartate                                 | G | std  | 12.08 | 232      |          |    |
| 68 | Aspartyllysine                            | N | HMDB | 3.52  | 261.1359 | 261.1325 | 0  |
| 69 | Barium                                    | N | HMDB | 0.63  | 137.9012 | 137.9052 | 0  |
| 70 | Benzaldehyde                              | P | HMDB | 1.41  | 106.0415 | 106.0419 | 0  |
| 71 | Benzamide                                 | N | HMDB | 0.83  | 121.0517 | 121.0528 | 10 |
| 72 | Benzoic acid <sup>a</sup>                 | G | std  | 8.52  | 105      |          |    |
| 73 | Betaine                                   | P | std  | 0.65  | 117.0781 |          | 0  |
| 74 | Biliverdin                                | P | HMDB | 9.23  | 582.2471 | 582.2479 | 0  |
| 75 | Butyrylcarnitine                          | N | HMDB | 1.54  | 231.1454 | 231.1471 | 0  |
| 76 | Carnitine                                 | P | std  | 0.64  | 161.1035 |          | 0  |
| 77 | Carnitine (18:1)                          | P | HMDB | 4.55  | 425.3494 | 425.3505 | 0  |
| 78 | Carnosic acid                             | P | HMDB | 2.72  | 332.1981 | 332.1988 | 1  |
| 79 | Chenodeoxycholic acid                     | N | std  | 3.71  | 392.2918 |          | 97 |

|     |                                   |   |      |       |          |          |     |
|-----|-----------------------------------|---|------|-------|----------|----------|-----|
| 80  | Chenodeoxyglycocholic acid        | N | HMDB | 3.42  | 449.314  | 449.3141 | 0   |
| 81  | Cholesterol                       | G | std  | 28.17 | 129      |          |     |
| 82  | Cholesterol sulfate               | N | HMDB | 4.38  | 466.3116 | 466.3117 | 11  |
| 83  | Cholic acid                       | N | std  | 3.21  | 408.2869 |          | 98  |
| 84  | Cis-5-Tetradecenoyl carnitine     | P | HMDB | 3.69  | 369.287  | 369.2879 | 0   |
| 85  | Cis-Aconitate                     | N | std  | 1.43  | 173.9978 |          | 21  |
| 86  | Citrate                           | G | std  | 16.16 | 157      |          |     |
| 87  | Citrulline                        | G | std  | 13.31 | 142      |          |     |
| 88  | Corticosterone                    | P | HMDB | 5.10  | 346.2113 | 346.2144 | 2   |
| 89  | CPA(18:0/0:0)                     | N | HMDB | 4.05  | 420.2629 | 420.2641 | 130 |
| 90  | Creatinine <sup>a</sup>           | G | std  | 12.54 | 115      |          |     |
| 91  | Cysteine                          | G | std  | 12.52 | 220      |          |     |
| 92  | Cystine                           | G | std  | 21.83 | 218      |          |     |
| 93  | Decanoic acid                     | N | std  | 3.82  | 172.141  |          | 4   |
| 94  | Decanoyl carnitine                | P | HMDB | 3.15  | 315.2398 | 315.241  | 0   |
| 95  | DHEA sulfate                      | N | HMDB | 2.39  | 368.1649 | 368.1657 | 0   |
| 96  | Docosahexaenoic acid <sup>a</sup> | G | std  | 23.24 | 91       |          |     |
| 97  | Dodecanoic acid <sup>a</sup>      | G | std  | 13.86 | 117      |          |     |
| 98  | Dodecanoyl carnitine              | P | HMDB | 3.53  | 343.271  | 343.2722 | 0   |
| 99  | Dopamine                          | P | std  | 0.76  | 153.075  |          | 66  |
| 100 | dUMP                              | P | HMDB | 0.78  | 308.0377 | 308.0409 | 0   |
| 101 | Eicosenoic acid                   | N | HMDB | 7.76  | 310.2859 | 310.2871 | 0   |
| 102 | Elaidic acid                      | G | std  | 21.42 | 117      |          |     |
| 103 | Erythrotetrofuranose              | G | NIST | 16.51 | 73       |          |     |
| 104 | Estrone glucuronide               | N | HMDB | 2.04  | 446.1954 | 446.1941 | 118 |
| 105 | Ethanolamine                      | G | NIST | 5.59  | 102      |          |     |
| 106 | Fructose                          | G | std  | 16.77 | 103/103  |          |     |
| 107 | Fumarate                          | G | std  | 9.91  | 245      |          |     |
| 108 | Galactose                         | G | NIST | 17.07 | 191      |          |     |
| 109 | Gluconic acid                     | G | NIST | 18.01 | 73/73    |          |     |
| 110 | Gluconolactone                    | G | NIST | 16.49 | 140/140  |          |     |
| 111 | Glucopyranose                     | G | NIST | 18.29 | 204      |          |     |
| 112 | Glucose                           | G | std  | 17.15 | 205/319  |          |     |
| 113 | Glucose-6-phosphate               | G | NIST | 22.25 | 204      |          |     |
| 114 | Glucuronic acid-1-phosphate       | N | HMDB | 0.72  | 274.0044 | 274.009  | 75  |
| 115 | Glutamate <sup>a</sup>            | G | std  | 13.38 | 246      |          |     |
| 116 | Glutamine <sup>a</sup>            | G | std  | 15.45 | 156      |          |     |
| 117 | Glutamylalanine                   | P | HMDB | 2.09  | 218.0909 | 218.0903 | 131 |
| 118 | Glyceraldehyde <sup>a</sup>       | G | std  | 7.81  | 73       |          |     |
| 119 | Glyceric acid                     | G | std  | 9.57  | 102      |          |     |
| 120 | Glycerol                          | G | std  | 8.78  | 205      |          |     |
| 121 | Glycerolphosphate                 | G | std  | 15.23 | 73       |          |     |
| 122 | Glycine                           | G | std  | 9.28  | 174/102  |          |     |
| 123 | Glycochenodeoxycholic acid        | P | std  | 3.41  | 471.2952 |          | 52  |

|     |                                             |   |      |        |          |          |     |
|-----|---------------------------------------------|---|------|--------|----------|----------|-----|
| 124 | Glycochenodeoxycholic acid<br>3-glucuronide | N | HMDB | 2.97   | 625.3436 | 625.3462 | 0   |
| 125 | Glycocholic acid                            | N | std  | 4.17   | 465.3077 |          | 107 |
| 126 | Glycolaldehyde                              | N | HMDB | 0.72   | 60.0216  | 60.0211  | 82  |
| 127 | Guanidinosuccinic acid                      | P | std  | 0.75   | 175.0581 |          | 74  |
| 128 | Hexanoic acid                               | G | std  | 5.92   | 173      |          |     |
| 129 | Hexanoyl carnitine                          | P | HMDB | 2.23   | 259.1764 | 259.1783 | 64  |
| 130 | Hippuric acid                               | N | HMDB | 1.36   | 179.0594 | 179.0582 | 161 |
| 131 | Histidine <sup>a</sup>                      | G | std  | 17.51  | 154      |          |     |
| 132 | Histidinol                                  | N | std  | 0.83   | 141.0776 |          | 152 |
| 133 | Homovanillic acid                           | P | std  | 1.79   | 182.0124 |          | 0   |
| 134 | Hydroquinone                                | N | std  | 1.39   | 110.0345 |          | 113 |
| 135 | Hydroxyacetic acid                          | G | std  | 5.95   | 147      |          |     |
| 136 | Hypotaurine                                 | G | std  | 13.42  | 188      |          |     |
| 137 | Hypoxanthine <sup>a</sup>                   | G | std  | 15.93  | 265      |          |     |
| 138 | Indole                                      | P | HMDB | 1.81   | 117.0575 | 117.0578 | 0   |
| 139 | Indoleacrylic acid                          | P | HMDB | 1.6    | 187.0619 | 187.0633 | 0   |
| 140 | Indoxyl                                     | N | HMDB | 1.49   | 133.0513 | 133.0528 | 103 |
| 141 | Indoxyl sulfate                             | N | HMDB | 1.48   | 213.0087 | 213.0096 | 26  |
| 142 | Inosine                                     | N | std  | 0.83   | 268.0807 |          | 79  |
| 143 | Inositol                                    | G | std  | 19.92  | 73       |          |     |
| 144 | Isoleucine <sup>a</sup>                     | G | std  | 9.12   | 158      |          |     |
| 145 | Isovalerylcarnitine                         | N | HMDB | 1.85   | 245.161  | 245.1627 | 0   |
| 146 | Kynurenic acid                              | N | HMDB | 0.83   | 189.0462 | 189.0426 | 0   |
| 147 | Lactate                                     | G | std  | 5.7    | 117      |          |     |
| 148 | Leucine                                     | G | std  | 8.79   | 158      |          |     |
| 149 | Leucyl-proline                              | P | HMDB | 0.77   | 228.1455 | 228.1474 | 0   |
| 150 | Linoelaidyl carnitine                       | P | HMDB | 4.12   | 423.3331 | 423.3349 | 0   |
| 151 | Linolic acid                                | G | std  | 21.33  | 81       |          |     |
| 152 | LPA(16:0/0:0)                               | P | HMDB | 4.043  | 410.2429 | 410.2434 | 0   |
| 153 | LPA(18:0/0:0)                               | P | HMDB | 4.53   | 438.2761 | 438.2746 | 3   |
| 154 | LPA(18:1/0:0)                               | P | HMDB | 4.1062 | 436.2588 | 436.259  | 0   |
| 155 | Lysine                                      | G | std  | 17.57  | 156      |          |     |
| 156 | LysoPC(14:0)                                | P | HMDB | 3.91   | 467.3003 | 467.3012 | 0   |
| 157 | LysoPC(16:0)                                | N | HMDB | 4.02   | 495.3327 | 495.3325 | 1   |
| 158 | LysoPC(16:1)                                | P | HMDB | 4.05   | 493.3161 | 493.3168 | 0   |
| 159 | LysoPC(20:0)                                | P | HMDB | 7.43   | 551.3947 | 551.3951 | 0   |
| 160 | LysoPC(22:1)                                | P | HMDB | 7.61   | 577.4075 | 577.4108 | 0   |
| 161 | LysoPC(P-18:1)                              | P | HMDB | 5.09   | 505.3511 | 505.3532 | 0   |
| 162 | LysoPE(18:0/0:0)                            | P | HMDB | 4.05   | 481.3163 | 481.3168 | 0   |
| 163 | Malic acid                                  | G | std  | 11.69  | 73       |          |     |
| 164 | Mannose <sup>a</sup>                        | N | std  | 0.73   | 180.0625 |          | 0   |
| 165 | Mercaptoacetic acid                         | G | NIST | 10     | 160      |          |     |
| 166 | Mesobilirubinogen                           | P | HMDB | 3.4    | 592.3246 | 592.3261 | 0   |

|     |                                |   |      |       |          |          |     |
|-----|--------------------------------|---|------|-------|----------|----------|-----|
| 167 | Methionine <sup>a</sup>        | G | std  | 12.09 | 176      |          |     |
| 168 | Methylcysteine                 | G | std  | 10.85 | 162      |          |     |
| 169 | Methylmaleic acid              | G | NIST | 9.87  | 117      |          |     |
| 170 | Myristic acid <sup>a</sup>     | G | std  | 16.58 | 285      |          |     |
| 171 | N-Acetyl-5-hydroxytryptamine   | N | std  | 2.25  | 218.0909 |          | 128 |
| 172 | N-Acetyl-aspartic acid         | N | std  | 0.76  | 175.0363 |          | 0   |
| 173 | N-Acetylaspartylglutamic acid  | N | HMDB | 0.83  | 304.0867 | 304.0907 | 0   |
| 174 | N-Acetylglutamine              | G | NIST | 13.21 | 274      |          |     |
| 175 | N-Formyl-methionine            | N | HMDB | 0.75  | 177.043  | 177.046  | 98  |
| 176 | Nicotinamide                   | P | std  | 1.15  | 122.0359 |          | 4   |
| 177 | Nonanoic acid                  | G | std  | 10.06 | 117      |          |     |
| 178 | Octadecanoic acid <sup>a</sup> | G | std  | 21.56 | 117      |          |     |
| 179 | Octanoic acid <sup>a</sup>     | G | std  | 7.27  | 151      |          |     |
| 180 | Octanoyl carnitine             | P | HMDB | 2.73  | 287.2086 | 287.2097 | 0   |
| 181 | Octenedioate                   | P | HMDB | 1.43  | 172.0719 | 172.0735 | 0   |
| 182 | Oleamide <sup>a</sup>          | G | std  | 22.5  | 144      |          |     |
| 183 | Oleic acid <sup>a</sup>        | G | std  | 21.38 | 129/117  |          |     |
| 184 | Ornithine                      | G | std  | 16.07 | 142      |          |     |
| 185 | Oxalic acid                    | G | std  | 6.76  | 147      |          |     |
| 186 | Oxaloacetic acid               | G | NIST | 12.44 | 98       |          |     |
| 187 | Palmitic acid                  | G | std  | 19.41 | 117      |          |     |
| 188 | Palmitoleic acid               | G | std  | 19.11 | 117      |          |     |
| 189 | Palmitoyl carnitine            | P | HMDB | 4.4   | 399.3324 | 399.3349 | 0   |
| 190 | p-Cresol <sup>a</sup>          | G | std  | 7.13  | 152      |          |     |
| 191 | Pentaglutamyl folate           | P | HMDB | 0.64  | 957.3135 | 957.3101 | 0   |
| 192 | Perillic acid                  | N | HMDB | 2.71  | 166.0996 | 166.0994 | 145 |
| 193 | Phenol                         | N | HMDB | 0.83  | 94.0413  | 94.0419  | 39  |
| 194 | Phenylalanine <sup>a</sup>     | G | std  | 13.5  | 218      |          |     |
| 195 | Phosphate                      | G | std  | 8.78  | 299      |          |     |
| 196 | Phosphohydroxypyruvic acid     | N | HMDB | 9.42  | 183.9775 | 183.9773 | 0   |
| 197 | Phytosphingosine               | P | HMDB | 3.36  | 317.2917 | 317.293  | 0   |
| 198 | Pregnenolone sulfate           | N | HMDB | 2.6   | 396.1965 | 396.197  | 7   |
| 199 | Proline <sup>a</sup>           | G | std  | 9.19  | 142      |          |     |
| 200 | Proline betaine                | P | HMDB | 0.69  | 143.0937 | 143.0946 | 0   |
| 201 | Propionyl carnitine            | P | HMDB | 1.27  | 217.1302 | 217.1314 | 0   |
| 202 | Pyrrole-2-carboxylic acid      | G | NIST | 10.34 | 240      |          |     |
| 203 | Pyruvate                       | G | std  | 5.56  | 174      |          |     |
| 204 | Quinolinic acid                | P | HMDB | 0.71  | 167.0197 | 167.0219 | 21  |
| 205 | Retinyl ester                  | N | HMDB | 5.04  | 302.2239 | 302.2246 | 1   |
| 206 | Rhamnose <sup>a</sup>          | G | std  | 14.71 | 73       |          |     |
| 207 | Ribitol                        | G | NIST | 14.44 | 171      |          |     |
| 208 | Sagittariol                    | P | HMDB | 6.03  | 306.2549 | 306.2559 | 0   |
| 209 | Serine                         | G | std  | 10    | 204/116  |          |     |
| 210 | Sorbitol <sup>a</sup>          | G | std  | 14.08 | 73       |          |     |

|     |                                 |   |      |       |          |          |     |
|-----|---------------------------------|---|------|-------|----------|----------|-----|
| 211 | Sphinganine                     | P | HMDB | 3.72  | 301.297  | 301.2981 | 0   |
| 212 | Sphingosine-1-phosphate         | P | HMDB | 3.86  | 379.2493 | 379.2487 | 0   |
| 213 | Stearoylcarnitine               | N | HMDB | 5.25  | 427.3664 | 427.3662 | 0   |
| 214 | Succinic acid                   | G | std  | 9.43  | 147      |          |     |
| 215 | Sulfolithocholyglycine          | P | HMDB | 2.52  | 513.2764 | 513.276  | 0   |
| 216 | Taurine                         | N | std  | 0.71  | 125.0183 |          | 0   |
| 217 | Taurochenodesoxycholic acid     | P | HMDB | 2.56  | 499.2964 | 499.2968 | 71  |
| 218 | Tetradecanedioic acid           | N | HMDB | 3.15  | 258.1823 | 258.1831 | 138 |
| 219 | Tetrahydrocortisol              | P | HMDB | 6.36  | 350.2431 | 350.2457 | 0   |
| 220 | Tetrahydrogestrinone            | P | HMDB | 0.72  | 284.1093 | 284.1049 | 3   |
| 221 | Tetrahydropteridine             | P | HMDB | 9.48  | 136.0758 | 136.0749 | 0   |
| 222 | Threitol                        | G | std  | 11.9  | 73       |          |     |
| 223 | Threonic acid                   | G | std  | 12.32 | 73/292   |          |     |
| 224 | Threonine <sup>a</sup>          | G | std  | 10.34 | 73       |          |     |
| 225 | Thyroxine                       | P | std  | 2.93  | 776.6879 |          | 4   |
| 226 | trans-Hexadec-2-enoyl carnitine | P | HMDB | 4     | 397.3178 | 397.3192 | 0   |
| 227 | Tridecanoic acid                | N | HMDB | 4.64  | 214.1923 | 214.1933 | 116 |
| 228 | Trihydroxycoprostanic acid      | N | HMDB | 4.73  | 464.3505 | 464.3502 | 102 |
| 229 | Trimethylamine N-oxide          | P | std  | 0.66  | 75.0607  |          | 119 |
| 230 | Tryptophan <sup>a</sup>         | G | std  | 21.32 | 202      |          |     |
| 231 | Tyrosine <sup>a</sup>           | G | std  | 17.8  | 218      |          |     |
| 232 | Ubiquinone                      | P | HMDB | 3.56  | 250.1199 | 250.1205 | 0   |
| 233 | Ubiquinone Q2                   | P | HMDB | 7.21  | 318.1869 | 318.1831 | 0   |
| 234 | Urea                            | G | std  | 8.49  | 171/171  |          |     |
| 235 | Uric acid <sup>a</sup>          | G | std  | 20.07 | 441      |          |     |
| 236 | Uridine                         | N | std  | 0.77  | 244.0688 |          | 5   |
| 237 | Urobilin                        | P | HMDB | 3.37  | 594.3371 | 594.3417 | 0   |
| 238 | Urobilinogen                    | P | HMDB | 3.41  | 596.3556 | 596.3574 | 0   |
| 239 | Valine <sup>a</sup>             | G | std  | 8     | 144      |          |     |
| 240 | Xanthine                        | N | std  | 0.77  | 152.033  |          | 5   |
| 241 | Xanthosine                      | N | HMDB | 5     | 284.0779 | 284.0757 | 152 |
| 242 | Xylose                          | G | std  | 13.86 | 73       |          |     |
| 243 | $\alpha$ -Aminoadipic acid      | G | NIST | 12.43 | 218      |          |     |
| 244 | $\alpha$ -Aminobutanoic acid    | G | std  | 7.36  | 130      |          |     |
| 245 | $\alpha$ -CEHC                  | N | HMDB | 1.91  | 278.1522 | 278.1518 | 0   |
| 246 | $\alpha$ -Tocopherol            | G | std  | 27.93 | 237      |          |     |
| 247 | $\beta$ -Alanine                | G | std  | 10.93 | 174      |          |     |
| 248 | $\beta$ -aspartyl-glutamate     | P | HMDB | 3.09  | 262.0825 | 262.0801 | 0   |
| 249 | $\beta$ -aspartyl-serine        | P | HMDB | 2.24  | 220.0743 | 220.0695 | 0   |

<sup>a</sup> Metabolites that can be identified by GC-TOFMS and UPLC-QTOFMS; <sup>b</sup> platform, G: data obtained from GC-TOFMS, P: data obtained from positive ion mode of UPLC-QTOFMS, N: data obtained from negative ion mode of UPLC-QTOFMS. <sup>c</sup> std, metabolites validated by reference standards by comparing the mass spectrum or accurate mass and the retention time. For GC-TOFMS, the mass spectrum similarity higher than 70% and retention time difference less than 0.5 min, for

UPLC-QTOFMS, the accurate mass difference less than 0.05Da and retention time difference less than 0.5 min, compare with our in-house library; NIST, annotated with National Institute of Standards and Technology (NIST) database with mass spectrum similarity more than 70%; HMDB, annotated with Human Metabolome Database (HMDB) by comparing the accurate mass difference less than 0.005; <sup>d</sup> in GC-TOFMS platform, M stands for quantity mass, while in UPLC-QTOFMS platform, M stands for the detected monoisotopic molecular weight. <sup>e</sup> MR, stands for the monoisotopic molecular weight recorded in HMDB database. <sup>f</sup> The number of missing values in each metabolite detected with UPLC-QTOFMS.

Supplementary Table 2. Most significant metabolites markers identified in our two CRC metabonomics studies.

| No. | Differential metabolite                  | Identified in our previous study <sup>b</sup> |                | Identified in the current study |                | 20 most significant markers identified in our HCC study <sup>e</sup> |
|-----|------------------------------------------|-----------------------------------------------|----------------|---------------------------------|----------------|----------------------------------------------------------------------|
|     |                                          | FC <sup>c</sup> R/C                           | P <sup>d</sup> | FC <sup>c</sup> R/C             | P <sup>d</sup> |                                                                      |
| 1   | Pyruvate <sup>a</sup>                    | 2.1                                           | 9.57E-13       | 1.30                            | 1.10E-03       | Oleamide                                                             |
| 2   | 2-hydroxybutanoic acid <sup>a</sup>      | 1.4                                           | 2.84E-04       | 2.09                            | 7.43E-11       | Arabinose                                                            |
| 3   | 3-hydroxybutanoic acid <sup>a</sup>      | 1.4                                           | 1.70E-02       | 8.59                            | 9.87E-15       | 2,3-dihydroxyl-propanoic acid                                        |
| 4   | Urea <sup>a</sup>                        | -1.4                                          | 1.15E-03       | -1.37                           | 1.65E-06       | Cystine                                                              |
| 5   | 4-hydroxyproline <sup>a</sup>            | -1.5                                          | 1.71E-04       | -1.80                           | 3.18E-07       | 4-ketoglucose                                                        |
| 6   | Ornithine <sup>a</sup>                   | -1.4                                          | 3.93E-04       | -1.27                           | 5.43E-06       | Inosine                                                              |
| 7   | Tryptophan <sup>a</sup>                  | -1.6                                          | 2.04E-05       | -1.45                           | 7.31E-12       | 2,3-dihydroxy-2(3H)-furanone                                         |
| 8   | Oleic acid <sup>a</sup>                  | 1.1                                           | 4.23E-02       | 1.55                            | 9.31E-06       | Creatinine                                                           |
| 9   | Phenylalanine <sup>a</sup>               | -1.2                                          | 3.34E-02       | -1.35                           | 1.30E-13       | 3-amino-2-piperidone                                                 |
| 10  | Glutamic acid <sup>a</sup>               | -1.7                                          | 1.21E-06       | -1.29                           | 1.78E-03       | Ornithine                                                            |
| 11  | Oleamide                                 | -3                                            | 2.04E-15       | 2.55                            | 7.91E-06       | Glucosamine                                                          |
| 12  | Palmitic acid                            | -1.4                                          | 9.00E-04       | 1.24                            | 2.46E-03       | Citrulline                                                           |
| 13  | Valine <sup>a</sup>                      | -1.5                                          | 3.09E-05       | -1.14                           | 5.32E-03       | Phosphoric acid                                                      |
| 14  | Threonic acid <sup>a</sup>               | -1.6                                          | 5.51E-05       | -1.09                           | 2.34E-02       | Arachidonic acid                                                     |
| 15  | Malic acid <sup>a</sup>                  | 1.3                                           | 3.82E-03       | 1.17                            | 5.73E-03       | Fumaric acid                                                         |
| 16  | 2-Piperidinecarboxylic acid <sup>a</sup> | -1.3                                          | 7.90E-03       | -1.53                           | 4.53E-03       | α-tocopherol                                                         |
| 17  | Hippurate <sup>a</sup>                   | -1.5                                          | 3.77E-02       | -8.14                           | 2.49E-03       | Lysine                                                               |
| 18  | Lysine <sup>a</sup>                      | -1.4                                          | 2.91E-03       | -1.14                           | 4.34E-03       | Cysteine                                                             |
| 19  | Myristic acid                            | -1.3                                          | 3.40E-03       | 1.25                            | 1.95E-02       | Docosahexaenoic acid                                                 |
| 20  | Carnitine <sup>a</sup>                   | 1.3                                           | 7.30E-03       | 1.18                            | 3.14E-03       | Aspartic acid                                                        |
| 21  | Nicotinamide                             | -1.2                                          | 3.20E-03       | 1.11                            | 2.00E-02       |                                                                      |
| 22  | Arginine <sup>a</sup>                    | -1.3                                          | 1.29E-02       | -1.16                           | 2.42E-02       |                                                                      |
| 23  | Lactate                                  | 1.3                                           | 8.99E-03       | 1.02                            | 7.57E-01       |                                                                      |
| 24  | Leucine                                  | -1.5                                          | 1.20E-04       | -1.09                           | 6.33E-02       |                                                                      |
| 25  | Proline                                  | -1.3                                          | 1.01E-02       | -1.10                           | 1.13E-01       |                                                                      |
| 26  | Threonine                                | -1.4                                          | 5.80E-03       | -1.08                           | 1.03E-01       |                                                                      |
| 27  | Citrulline                               | -1.4                                          | 3.94E-04       | -1.09                           | 5.68E-02       |                                                                      |
| 28  | Tyrosine                                 | -1.5                                          | 9.89E-05       | 1.15                            | 1.83E-01       |                                                                      |
| 29  | Glycerol phosphate                       | 1.5                                           | 3.89E-05       | -1.09                           | 5.90E-02       |                                                                      |
| 30  | Dopamine                                 | -1.3                                          | 9.80E-03       | -1.23                           | 5.62E-01       |                                                                      |
| 31  | Uridine                                  | 1.1                                           | 1.14E-06       | 1.01                            | 7.68E-01       |                                                                      |

<sup>a</sup> The differential metabolites identified in both studies with the same up and down direction. <sup>b</sup> Our previous publication refers to: Qiu Y., Cai G., Su M., et al. Serum metabolite profiling of human colorectal cancer using GC-TOFMS and UPLC-QTOFMS. *J Proteome Res* 2009; 8, 4844-50. <sup>c</sup> The fold change (FC) was calculated by the average value of CRC group to that of control group. FC with a value larger than 1.0 indicates a higher level of the serum metabolite in patients while a FC value lower than 1.0 indicates a lower level, compared to healthy controls. <sup>d</sup> P values were calculated from nonparametric Wilcoxon-Mann-Whitney test. <sup>e</sup> Our HCC study refers to: Chen T., Xie G., Wang X. et al.

Serum and urine metabolite profiling reveals potential biomarkers of human hepatocellular carcinoma. *Mol Cell Proteomics* 2011; 10 (7): M110 004945. HCC, hepatocellular carcinoma.

### **3. Quality control**

The relative standard derivation (RSD) of the internal standard(s) was used to control the quality of the whole data set. For GC-TOFMS, the overall RSD was set to below 20%, and for UPLC-QTOFMS, that was set to below 15%.

The relative standard derivations (RSDs) for the internal standards were 18.81% for chlorophenylalanine and 18.95 % for heptadecanoic acid in GC-TOFMS analysis over all samples. In the UPLC-QTOFMS analysis, the RSD was 12.06 % for negative mode and 14.79 % for positive mode.

In addition to internal standards, a QC sample with mixed (external) standard compounds was also used to control the quality of the sample analysis. Each 10 samples run was followed by a QC sample. Using the same parameters, data analysis of these QC samples was performed. The relative standard derivations (RSD) were calculated in the supplementary Table 3. The results showed acceptable data quality in the current study with all the RSDs less than 20% in GCTOFMS and RSDs less than 15% in UPLC-QTOFMS (except for uridine).



Supplementary Table 3. Reference standards used in the quality control samples in GC-TOFMS, UPLC-QTOFMS (ES-), and UPLC-QTOFMS (ES+).

| GC-TOFMS                |         | UPLC-QTOFMS (ES-)      |         | UPLC-QTOFMS (ES+)      |         |
|-------------------------|---------|------------------------|---------|------------------------|---------|
| Reference standards     | RSD (%) | Reference standards    | RSD (%) | Reference standards    | RSD (%) |
| L-Lactate               | 16.42   | 3-indolepropionic acid | 2.43    | 2-Aminoisobutyric acid | 10.48   |
| L-Alanine               | 13.72   | D-Panthenol            | 2.15    | L-Serine               | 12.56   |
| 3-Hydroxybutyric acid   | 15.71   | Palmitoleic acid       | 3.77    | Betaine                | 10.73   |
| 2-hydroxybutanoic acid  | 11.32   | Eicosapentaenoic acid  | 3.83    | Nicotinic acid         | 12.59   |
| á-Amino isobutyric acid | 14.70   | Nimodipine             | 3.08    | L-carnitine            | 10.26   |
| L-Valine                | 10.75   |                        |         | L-arginine             | 9.83    |
| L-Leucine               | 9.07    |                        |         | Uridine                | 19.59   |
| L-Isoleucine            | 9.14    |                        |         |                        |         |
| L-Proline               | 18.33   |                        |         |                        |         |
| L-Serine                | 11.84   |                        |         |                        |         |
| L-Threonine             | 11.15   |                        |         |                        |         |
| L-Aspartic acid         | 14.56   |                        |         |                        |         |
| L-Methionine            | 9.69    |                        |         |                        |         |
| L-Phenylalanine         | 7.92    |                        |         |                        |         |
| L-Glutamine             | 19.75   |                        |         |                        |         |
| d-Galactose             | 12.56   |                        |         |                        |         |
| Palmitoleic acid        | 14.72   |                        |         |                        |         |
| Palmitic acid           | 18.20   |                        |         |                        |         |
| Myo-Inositol            | 13.58   |                        |         |                        |         |
| Linolic acid            | 16.48   |                        |         |                        |         |
| Oleic acid              | 17.86   |                        |         |                        |         |
| Cholesterol             | 17.71   |                        |         |                        |         |
| Average                 | 13.87   |                        | 3.05    |                        | 12.29   |

RSD, relatively standard derivation.
